1 Genetic diversity at putatively adaptive but not neutral loci in *Primula*  
2 *veris* responds to recent habitat change in semi-natural grasslands

3 S. Träger\*<sup>1,2</sup>, C. Rellstab<sup>3</sup>, I. Reinula<sup>1</sup>, N. Zemp<sup>4</sup>, A. Helm<sup>1</sup>, R. Holderegger<sup>3,5</sup>, T. Aavik<sup>1</sup>

4 <sup>1</sup>Department of Botany, Institute of Ecology and Earth Sciences, University of Tartu, Lai 40,  
5 51005 Tartu, Estonia

6 <sup>2</sup>Institute of Biology/Geobotany and Botanical Garden, Martin-Luther-University Halle-  
7 Wittenberg, Große Steinstr. 79/80, 06108 Halle (Saale), Germany

8 <sup>3</sup>WSL Swiss Federal Research Institute, Zürcherstrasse 111, 8903 Birmensdorf, Switzerland

9 <sup>4</sup>Genetic Diversity Centre (GDC), ETH Zurich, Universitätstrasse 16, 8092 Zürich, Switzerland

10 <sup>5</sup>Institute of Integrative Biology (IBZ), ETH Zurich, Universitätstrasse 16, 8092 Zürich,  
11 Switzerland

12 \*Corresponding author. E-mail: [sabrina.traeger@botanik.uni-halle.de](mailto:sabrina.traeger@botanik.uni-halle.de)

13

14 Running head: Plant genetic response to habitat change

15

16 Note

17 The following manuscript is under consideration at *Molecular Ecology*.

## 18 Abstract

19 Recent habitat change in semi-natural grasslands due to a lack of management has been  
20 shown to affect the genetic diversity of grassland plants. However, it is unknown how such a  
21 change in local environment affects genetic diversity at adaptive loci. We applied RADseq  
22 (restriction-site associated DNA sequencing) to extract > 3,000 SNPs across 568 individuals  
23 from 32 Estonian populations of *Primula veris*, a plant species common to semi-natural  
24 grasslands. We evaluated the effect of recent grassland overgrowth due to management  
25 abandonment on the genetic diversity at both putatively neutral and adaptive loci, which we  
26 distinguished by applying three methods, i.e., linear and categorical environmental  
27 association analyses, and an  $F_{ST}$  outlier test. Effects of recent habitat change on genetic  
28 diversity differed between neutral and adaptive SNP sets. Genetic diversity assessed at  
29 putatively neutral loci was similar in open and overgrown habitats but showed a significant  
30 difference between these habitat types at putatively adaptive loci: overgrown (i.e. newly  
31 established) habitats exhibited higher genetic diversity at putatively adaptive loci compared  
32 to open (i.e. old) habitats, most likely due to the exertion of novel selection pressures  
33 imposed by new habitat conditions. This increase in genetic diversity at putatively adaptive  
34 loci in the new environment points to currently ongoing selection processes where genetic  
35 adaptation to the old habitat was lost through altered allele frequencies. Our study  
36 emphasises that a recent change in local habitat conditions may not be reflected in neutral  
37 loci whereas putatively adaptive loci can inform about potential ongoing selection in novel  
38 habitats.

39

40 **Key words:** environmental association analysis, genetic differentiation, habitat degradation,  
41 outlier test, semi-natural grasslands

## 42 Introduction

43 Habitat change is a consequence of ongoing anthropogenic landscape and climatic change  
44 (IPBES, 2018; IPCC, 2019). In particular, intensification of land use and abandonment of  
45 traditional management practices during the last century led to a dramatic degradation and  
46 isolation of habitats such as European semi-natural grasslands (Cousins, Auffret, Lindgren, &  
47 Tränk, 2015; Hooftman & Bullock, 2012). Historically, moderate and continuous human  
48 management (e.g. grazing by livestock) has led to open semi-natural grassland habitats with  
49 increased light availability and elevated niche partitioning, facilitating uniquely high levels of  
50 biodiversity (Habel et al., 2013; Wilson, Peet, Dengler, & Pärtel, 2012). Yet, abandonment of  
51 traditional management has gradually caused substantial loss in grassland area, and  
52 increased fragmentation and degradation due to overgrowth with dense woody vegetation  
53 or conversion to other land use types. This has resulted in negative effects on grassland  
54 biodiversity (Habel et al., 2013; Picó & Van Groenendael, 2007).

55 Likewise, the intra-specific genetic diversity of grassland plants can suffer from the  
56 degradation, fragmentation, and loss of semi-natural grasslands. Due to potentially reduced  
57 population sizes and increased landscape barriers, the genetic diversity of many insect-  
58 pollinated grassland plant species is compromised by interrupted pollen-mediated gene  
59 flow as a result of reduced pollinator movement in degraded and fragmented grasslands  
60 (e.g. DiLeo, Holderegger, & Wagner, 2018; Tewksbury et al., 2002). This likely aggravated  
61 gene flow contributes to potentially decreased genetic diversity and increased genetic  
62 differentiation in plant populations in affected grasslands (e.g. Honnay & Jacquemyn, 2007;  
63 Picó & Van Groenendael, 2007). However, plants might exhibit a delayed response to  
64 habitat changes (e.g. Aavik et al., 2019; Helm, Hanski, & Pärtel, 2006; Lehtilä et al., 2016).

65 For instance, life history traits, such as mating system and lifespan, can determine the speed  
66 and magnitude of a plant's response to a changed environment (Hamrick & Godt, 1996;  
67 Leimu, Mutikainen, Koricheva, & Fischer, 2006). With many grassland plants having a  
68 relatively long lifespan of up to several decades (Ehrlén & Lehtilä, 2002), such longevity  
69 might mask genetic effects induced by land use changes.

70 Genetic diversity is one of the central parameters in estimating a population's adaptive  
71 potential (Bilska & Szczecińska, 2016). However, because environmental change does not  
72 leave a signature in all parts of the genome (Nei, Suzuki, & Nozawa, 2010), such estimation  
73 requires differentiating between genetic diversity assessed at putatively neutral and  
74 adaptive loci (Bilska & Szczecińska, 2016). Here, we refer to putatively neutral loci when loci  
75 are affected by neutral processes such as gene flow but not by specific environmental  
76 factors. In contrast, putatively adaptive loci explicitly show a response to the tested  
77 environmental factors. Well-adapted populations might show a reduced diversity at  
78 adaptive loci due to beneficial mutations going towards fixation, and it is the adaptive  
79 potential at the population level that can be assessed with investigations of genetic diversity  
80 at adaptive loci (Milot et al., 2020). However, the difference in response of genetic diversity  
81 at putatively neutral and adaptive loci to habitat change has so far been mostly ignored, in  
82 particular in the context of recent land use change. The only existing studies that explicitly  
83 account for a difference in neutral and adaptive loci in plants concentrated on climatic  
84 factors (Dauphin et al., 2020; Sun et al., 2020). Moreover, in conservation genetics, most  
85 studies focussed on overall or genetic diversity at neutral loci so far, often using a set of  
86 neutral microsatellite markers, while ignoring adaptive regions of the genome (González et  
87 al., 2019; Wei & Jiang, 2020). However, it is exactly the adaptive regions that are important  
88 for the fate of a population.

89       With gradual grassland overgrowth, plant populations experience changed  
90 environmental conditions with novel selection pressures such as lower light availability,  
91 changes in soil chemical conditions, and altered and decreased pollinator communities  
92 (Helm, 2019), demanding for phenotypic plasticity of individuals or adaptation to the new  
93 habitat conditions. The adaptive potential of a population can be nourished from three  
94 sources: standing genetic variation (Barrett & Schluter, 2008; Radwan & Babik, 2012), gene  
95 flow (Slatkin, 1985) or, in the longer term, spontaneous mutations. Newly introduced  
96 barriers to gene flow should increase the importance of a population's standing genetic  
97 variation, and novel selection pressures induced by habitat change likely trigger a decrease  
98 in adaptation to the former grassland habitat. Thus, habitat change forces plants to either  
99 adapt to locally new habitat conditions predominantly based on their standing genetic  
100 variation in an aggravated gene flow scenario, to disperse to more favourable habitats, or to  
101 face local extinction (e.g. Cheptou, Hargreaves, Bonte, & Jacquemyn, 2017; Frankham,  
102 2005).

103       In the present study, we were interested in the effect of recent overgrowth of Estonian  
104 semi-natural grasslands with woody vegetation over the past century on the genetic  
105 diversity at putatively neutral and adaptive loci in *Primula veris* populations, a long-lived  
106 grassland specialist plant. Our study is one of the first to test for a land use change effect on  
107 both putatively neutral and adaptive loci in *in-situ* wild plant populations. We applied  
108 double-digest restriction-site associated DNA sequencing (ddRADseq) in 32 populations of *P.*  
109 *veris* from open and recently overgrown grasslands. We distinguished between putatively  
110 neutral and adaptive loci by performing a combination of environmental association  
111 analyses and  $F_{ST}$  outlier tests. We specifically asked whether (1) genetic diversity at neutral  
112 loci of *P. veris* populations is negatively affected by overgrowth of grasslands due to

113 potentially reduced population size and/or aggravated gene flow; (2) genetic diversity at  
114 adaptive loci exhibits a different response to habitat change than genetic diversity at neutral  
115 loci; and (3) genetic diversity at adaptive loci is actually increased due to ongoing selection  
116 processes where genetic adaptations to the old, open habitat are slowly lost through altered  
117 allele frequencies of the beneficial alleles for open and overgrown habitats.

118

## 119 **Materials and Methods**

120 Study species

121 *Primula veris* L. (Primulaceae) is an herbaceous perennial rosette-forming hemicryptophyte  
122 most commonly occurring in calcareous grasslands. *Primula veris* prefers open habitats but  
123 can grow under shade with reduced reproduction (Brys & Jacquemyn, 2009). Its average life  
124 span reaches up to 50 years (Ehrlén & Lehtilä, 2002). In Estonia, the study region, *P. veris*  
125 generally flowers in May. The study species is an obligate outbreeder that depends on  
126 insect-pollination (mostly bees and bumblebees; Deschepper, Brys, & Jacquemyn, 2018).  
127 Pollen dispersal is spatially restricted to several meters (Brys & Jacquemyn, 2009). Self-  
128 pollination is prevented by heterostyly with two flower morphs, with low levels of successful  
129 intra-morph pollination (Wedderburn & Richards, 1990). Primary seed dispersal is limited to  
130 a few metres from the maternal plant (Brys & Jacquemyn, 2009).

131 Study sites and sampling

132 Study sites were located on dry calcareous grasslands, alvars, on the islands of Muhu and  
133 Saaremaa in Western Estonia (Figure 1). Alvars are semi-natural grasslands on Ordovician  
134 and Silurian bedrock with only a low soil depth (< 20 cm). Management, i.e. grazing  
135 livestock, in the area was abandoned 20 – 90 years ago. Our study sites were part of a large-

136 scale biodiversity inventory of an European Commission's LIFE+ Nature program restoration  
137 project "LIFE to Alvars" (Helm, 2019), which included monitoring of genetic diversity of  
138 grassland plant species, including *P. veris*, in alvars at different successional stages of  
139 overgrowth (e.g. still open and recently overgrown). The mean temperature in the area is  
140 17°C in summer and -3°C in winter, and the mean annual precipitation is about 680 mm  
141 (EWS, 2020).

142 We sampled 32 populations (i.e. spatially distinct patches) of *P. veris* distributed across  
143 two regions, Muhu and Saaremaa islands, in the summers of 2015 and 2016 (Figure 1; Table  
144 1). Where possible, we chose pairs of closely located populations (i.e. within pollen- and  
145 seed-mediated gene flow distance) of contrasting habitat types (i.e. open and recently  
146 overgrown grasslands). Finally, 19 populations were located in open grasslands (i.e. old  
147 habitat; hereafter open habitats) and 13 populations were located in shrubby-overgrown  
148 grasslands (i.e. new habitat; hereafter overgrown habitats), comprising 10 population pairs  
149 with an average distance of 533 m and a minimum distance of 20 m between members of  
150 pairs. Such a paired sampling design has been shown to be efficient in detecting genomic  
151 signatures of local adaptation in environmental association analysis (EAA; Lotterhos &  
152 Whitlock, 2015) and allows the use of categorical EAA approaches (see below). Overgrown  
153 habitats represented mid-successional stages with at least 60% cover of shrubby vegetation,  
154 mostly *Juniperus communis*.

155 Within each population, we sampled three fresh leaves of 20 random flowering *P. veris*  
156 individuals (where possible) that were at least 50 cm apart. Leaves were stored in silica-gel  
157 until further processing. Approximate population census sizes of *P. veris* were estimated by  
158 assessing the number of both flowering and non-flowering individuals per population.

159 Environmental data

160 To characterize the environment of the study sites, we used data collected within the frame  
161 of the “LIFE to alvars” project (Helm, 2019). We selected 16 *in-situ* measured environmental  
162 variables regarding their potential to represent contrasting habitat types (open and  
163 overgrown) from multiple environmental levels, i.e. “openness”, “soil”, and “biota”. For  
164 openness, we considered the total percentual shrub and tree coverage, respectively,  
165 assessed within a radius of 10 m from the center of *P. veris* populations, and the light  
166 availability above and below the herbal layer measured with Li-Cor LI-250 Light Meter and  
167 LI-190SA Quantum Sensor (Lincoln, Nebraska, USA), in 1x1 m in the center of the  
168 population. For soil, we considered average soil depth in cm based on ten random locations  
169 taken within a 10 m radius around the central point of *P. veris* populations. In the same  
170 radius, five soil samples were taken from random locations and pooled for chemical  
171 analyses. From each sample, soil pH (KCl solution), available soil phosphorus (P; extraction  
172 with acid ammonium lactate solution), potassium (K), magnesium (Mg), calcium (Ca), and  
173 soil organic content (OC, loss on ignition) were measured. For biota, we considered butterfly  
174 and bumblebee abundance and richness and vascular plant richness within a 10 m radius  
175 around the central points of *P. veris* populations. Butterflies and bumblebees were  
176 monitored using standardised transect counts (Pollard, 1977). Each site was visited three  
177 times for butterflies and two times for bumblebees over two years to cover phenological  
178 aspects of different species (Helm, 2019).

179 In addition to the 16 *in-situ* measured environmental variables, we extracted climate  
180 data for each population from CHELSA (Karger et al., 2017) with a resolution of 30 arc sec  
181 from the reference period 1979-2013. To increase resolution, we applied a bi-linear  
182 interpolation that accounts for the climate values in surrounding grid cells and the position



183 of the population within the grid cell. For our analyses, we used temperature (Bio1, annual  
184 mean temperature) and precipitation (Bio12, annual precipitation sum), because they  
185 represent the most comprehensive bioclimatic variables describing the climate in our study  
186 region.

187 To test which environmental factors significantly differed between the two habitat  
188 types, we performed a (non-paired) two-sample t-test for each of the 18 environmental  
189 variables.

190 DNA extraction and ddRAD sequencing

191 Twenty-five mg of leaf material were pulverized with 2.3-mm chrome-steel beads (BioSpec  
192 Products, Bartlesville, USA) in a Mixer Mill 301 (Retsch, Haan, Germany). DNA was extracted  
193 using the LGC sbeadex plant kit (LGC, Berlin, Germany). 400  $\mu$ l lysis buffer, consisting of 1%  
194 RNase (100 mg/ml), 0.2% Proteinase K solution (20 mg/ml), and lysis buffer PN were added  
195 to pulverized samples, with an incubation time of 1 h at 65°C on a Thermomixer comfort  
196 (Eppendorf, Hamburg, Germany) at 300 rpm, and followed by a centrifugation at 2500 x g  
197 for 10 min. Lysates were transferred to binding solution, consisting of 420  $\mu$ l binding buffer  
198 PN and 10  $\mu$ l sbeadex particle solution. All following steps were conducted on a KingFisher  
199 Flex Purification System (Thermo Fisher Scientific, Waltham, USA), with the specification of  
200 using 400  $\mu$ l of wash buffer PN1 twice, 400  $\mu$ l of wash buffer PN2, and eluting purified DNA  
201 in 50  $\mu$ l elution buffer AMP.

202 We applied a ddRADseq procedure by customizing an existing ddRADseq protocol  
203 (Westergaard et al., 2019). ddRADseq applies a double restriction enzyme digest followed  
204 by a size-selection of genomic fragments (Peterson, Weber, Kay, Fisher, & Hoekstra, 2012).  
205 RADseq provides a simple and cost-effective method to uncover thousands of polymorphic

206 markers, both neutral and adaptive, in model and non-model organisms (e.g. Davey et al.,  
207 2011). Because the aim of our study was to identify general patterns of genetic diversity  
208 assessed at neutral and adaptive loci across a high number of samples from many  
209 populations, rather than identifying specific genes involved in adaptation, we chose not to  
210 use whole genome or targeted sequencing. Such methods might be, however, worthwhile  
211 to consider in future analyses following the results of the present study.

212 For the detailed ddRADseq protocol see supplemental information (Supplemental  
213 Methods). Briefly, standardized DNAs of fully randomized samples were digested and  
214 purified before ligation to a combination of one of 48 EcoRI and 2 TaqI adapters,  
215 respectively, resulting in uniquely tagged barcoded DNA samples. DNA samples with the  
216 same TaqI adapter but different EcoRI adapters (48 samples) were pooled together and size  
217 selected for fragments of 450 bp length. The size-selected sample pools were selected for  
218 fragments containing biotin labelled TaqI adapters. Subsequently, polymerase chain  
219 reaction (PCR) was conducted, PCR products (ddRADseq libraries) were purified and their  
220 DNA concentration was measured to calculate molarity per ddRADseq library. Finally,  
221 samples with distinct TaqI multiplexing indices were combined to produce a final library of  
222 at least 5 nM consisting of 96 samples (2 x 48 uniquely barcoded samples from two  
223 multiplex indices). In addition, for sequencing, we used 15% of a standard Illumina library to  
224 increase index diversity.

225 Pooled libraries were prepared according to guidelines of the sequencing facility and  
226 sequenced on an Illumina HiSeq2500 at the Functional Genomics Centre Zurich (FGCZ,  
227 Switzerland), using one lane per library with 125 cycles in single-end read (125 bp), high-  
228 output mode. The sample set per library included a negative (no sample DNA) and a positive

229 (sample replica; different positive controls in different libraries) control to exclude the  
230 possibility of contamination and to calculate the genotyping error of SNPs.

231 Bioinformatic analysis

232 Sequence data were demultiplexed, and PCR duplicates were filtered using the functions  
233 “process\_radtags” and “clone\_filter” of STACKS v1.47, respectively (Catchen et al., 2011;  
234 Catchen, Hohenlohe, Bassham, Amores, & Cresko, 2013). We used trimmed sequencing  
235 reads (generated sequences), applying TRIMMOMATIC v0.36 (Bolger, Lohse, & Usadel, 2014)  
236 with the following conditions: (1) removing Illumina adapter matches allowing a maximum  
237 of two mismatches, (2) removing leading and trailing low quality or N bases below a quality  
238 score of 5, (3) performing a 5 bp sliding window quality check and trimming sequence ends  
239 if quality dropped below 15, and (4) dropping sequences, which were < 50 bp after previous  
240 quality checks. Pre-filtered sequence reads were aligned and mapped against the reference  
241 genome of *P. veris* (Nowak et al., 2015) using BURROWS-WHEELER ALIGNER v0.7.17 (BWA; Li,  
242 2013). SNPs were called using FREEBAYES v1.1.0-54-g49413aa (Garrison & Marth, 2012)  
243 applying default values except a minimum-mapping-quality of 5, a minimum-base-quality of  
244 5, and evaluating the 10 best SNP alleles. We only used SNPs which met quality criteria of  
245 the DDOCENT SNP filtering pipeline (Puritz, Hollenbeck, & Gold, 2014; Puritz, Matz, et al.,  
246 2014) with customizing the following parameters: minimum quality score of 20, minor allele  
247 count of 3, and maximum missing value proportion of 20% across all individuals. Loci  
248 potentially in linkage disequilibrium were filtered using VCFTOOLS 0.1.15 (*geno-r2* function;  
249 Danecek et al., 2011) keeping one random SNP of potentially linked SNP pairs with a  
250 threshold of 0.8. Loci showing an excess of heterozygotes (> 60% of the samples identified  
251 as heterozygotes) were filtered in R v3.4.2 (R Development Core Team, 2017). The

252 genotyping error of filtered SNPs was calculated by the weighted mean of error rates using  
253 replica samples (i.e. positive controls) with TIGER v1.0 (Wegmann Lab, 2019).

254 Compilation of adaptive and neutral SNP sets

255 From the total SNP data set (SNP\_overall), we identified putatively adaptive SNPs

256 (SNP\_adapt) that were either (a) linearly associated to environmental factors or (b)

257 categorically associated to habitat types (see below). An additional putatively adaptive SNP

258 set (SNP\_BayScan) was compiled by identifying SNPs under potential diversifying or

259 balancing selection applying an  $F_{ST}$  outlier test using BAYESCAN v2.1 (Foll & Gaggiotti, 2008).

260 The models for BAYESCAN ran with default parameters (10 prior odds, 5,000 iterations with a

261 thinning interval of 10, a burn in of 50,000 and 20 pilot runs of 5,000 iterations). Potential

262  $F_{ST}$  outlier loci were extracted for  $q$ -values 0.05.

263 The putatively neutral SNP set (SNP\_neutral) was gained by excluding both putatively

264 adaptive SNP sets (SNP\_adapt and SNP\_BayScan) from SNP\_overall. Subsequently, we

265 calculated population genetic diversity parameters for both SNP\_neutral and SNP\_adapt.

266 We did not use the SNP\_BayScan set for the estimation of genetic diversity indices at

267 adaptive loci, because the SNPs identified by BAYESCAN might represent loci putatively

268 involved in adaptation to other environmental factors than investigated here and were only

269 used to better define SNP\_neutral.

270 Environmental association analyses

271 To detect putative signatures of natural selection in open and overgrown habitats, we used

272 EAA that correlates environmental variation (describing the local habitat) with genetic

273 variation of a population (Rellstab, Gugerli, Eckert, Hancock & Holderegger, 2015). Here, we

274 performed EAAs with two types of relationships: linear and categorical.

275 For the linear analysis, we used latent factor mixed models (*lfmm\_ridge* and *lfmm\_test*  
276 functions in LFMM v2.0 in R; Caye, Jumentier, Lepeule, & François, 2019), which test for a  
277 linear relationship of the allele frequency (AF) at each SNP with each environmental variable  
278 while accounting for population structure with random latent factors. All 32 populations  
279 were considered, and all 18 environmental variables were used in EAA. We did not remove  
280 correlated variables, because our aim was to identify all SNPs with any sign of  
281 environmental adaptation for the compilation of the different SNP sets. For all subsequent  
282 analyses, however, we concentrated on those SNPs that were associated with  
283 environmental variables that significantly differed among the two habitat types. In LFMM,  
284 the number of latent factors has to be set by the user and is recommended to be based on  
285 the number of genetic clusters in the study systems (see below) and the inflation factor  $\lambda$   
286 (François, Martins, Caye, & Schoville, 2016). To control for false discoveries, we adjusted the  
287  $p$  values per environmental variable using  $\lambda$  and the  $\chi^2$  distribution (Caye et al., 2019;  
288 François et al., 2016) and applied the Benjamini-Hochberg algorithm (Benjamini &  
289 Hochberg, 1995) with a false discovery rate (FDR) of 0.05.

290 For the categorical analysis, we performed three different pairwise analyses on  
291 population AFs of the 20 populations that were sampled in pairs, i.e., geographically close,  
292 but environmentally diverged (open-overgrown; Table 1): a paired t-test, a paired Wilcoxon  
293 signed-rank test, and a sign test. To reduce false positive findings, only SNPs whose  
294 population AFs were significantly different between habitat types in all three categorical  
295 tests were considered for further analyses. For the t- and Wilcoxon tests, we used an  $\alpha$   
296 value of 0.05. In the sign test, we checked whether AF differences between the two  
297 populations of all pairs were consistent (i.e. had the same sign). We considered SNPs

298 significant if they were consistent in a minimum of eight out of ten comparisons (pairwise  
299 AF differences of 0 were treated as consistent). In these categorical analyses, population  
300 structure is not directly incorporated, but since they test for differences within pairs,  
301 population structure can be ignored. It is unlikely that population structure would lead to  
302 different signs of AF differences in different pairs. For all further analyses on putatively  
303 adaptive SNPs (SNP\_adapt), we concentrated on the SNPs that were (a) associated in LFMM  
304 to those environmental variables that significantly differed among the two habitat types  
305 and/or (b) were significant in all three categorical tests.

306 For the SNP\_adapt set, we also wanted to know whether we find a non-random pattern  
307 of AF change ("direction") between the two populations of habitat pairs. For each SNP, we  
308 identified the putatively beneficial allele (i.e. major allele;  $AF > 0.5$ ) for the open habitat and  
309 then calculated the average AF change of this beneficial allele from open to overgrown  
310 habitat (the historical habitat change) within pairs. We then counted how many SNPs  
311 exhibited a beneficial AF decrease or increase from open to overgrown habitats and used an  
312 exact two-sided binomial test in R to check if this pattern deviated from a random 1:1 ratio.

313 Population genetic diversity

314 For measurements of genetic diversity at putatively neutral and adaptive loci, we calculated,  
315 for all SNP sets, observed heterozygosity ( $H_o$ ) using GENALEX 6.503 (Peakall & Smouse, 2012),  
316 and mean nucleotide diversity ( $\pi$ ) using VCFTOOLS within a window of 125 bp over all loci for  
317 each population. Note that both parameters do not rely on allele frequencies and are thus  
318 not confounded with the identification of putatively adaptive loci based on allele  
319 frequencies (EAA) described above.

320 The effect of habitat type (open or overgrown) and SNP set (SNP\_neutral or  
321 SNP\_adapt), and their interaction, on genetic indices ( $H_o$ ,  $\pi$ ) was tested using linear mixed  
322 effect models with population (1 – 32) and region (Muhu or Saaremaa) as random effects  
323 (lmerTest v3.1-0, *lmer* function; Kuznetsova, Brockhoff, & Christensen, 2017). The latter  
324 random effect accounted for potential differences in landscape history among regions. To  
325 quantify the importance of fixed factors and their interaction we used the Likelihood Ratio  
326 Test to obtain  $p$  values, analysing the variance between the full and reduced models with  
327 Satterthwaite approximation ( $\chi^2$  and associated  $p$  values). Here, we were particularly  
328 interested in the interaction of habitat type and SNP set. A significant interaction implies  
329 that genetic diversity indices assessed at putatively neutral and adaptive loci behave  
330 differently in open and recently overgrown habitats. If the interaction term was found  
331 significant, we tested for differences of genetic diversity indices in the different habitats for  
332 each SNP set using post-hoc tests with least-square means (*lsmeans* v2.30-0, *lsmeans*  
333 function; Lenth, 2016). We also tested for an effect of population size on genetic diversity  
334 indices by including it as a fixed effect in the above mixed effect models. Due to non-  
335 significant effects of population size and its interaction, we present the results of mixed  
336 effect models without population size, only.

337 Population genetic structure and potential gene flow

338 Population genetic structure using SNP\_neutral and SNP\_overall was analysed using  
339 discriminant analysis of principle components (DAPC) in adegenet v2.1.1 in R (Jombart,  
340 2008). DAPC uses uncorrelated principal component analysis (PCA) variables for  
341 discriminant analysis, producing synthetic discriminant functions that maximize between-  
342 group variation while minimizing within-group variation (Jombart, Devillard, & Balloux,  
343 2010). We used cross-validation with 50 replicates to determine the number of principal

344 components (PCs) to be retained to avoid overfitting. The function *find.clusters* was used to  
345 determine the optimal number of clusters within the data sets. For validation, we also  
346 applied a hierarchical clustering tree analysis on a Nei's genetic distance matrix using *mmod*  
347 v1.3.3 and the *aboot* function from *poppr* v2.8.4 in R (Kamvar et al., 2019), with a cut-off of  
348 50 and a bootstrap sample of 1,000.

349 Pairwise genetic differentiation ( $F_{ST}$ ) among populations for SNP\_neutral and  
350 SNP\_overall was calculated using *genepop* v1.0.5 (Rousset et al., 2017) in R. Potential effects  
351 of geographic distance and habitat type "distance" (open-open, overgrown-overgrown,  
352 open-overgrown/overgrown-open) on genetic differentiation ( $F_{ST}$ ) were tested for both SNP  
353 sets using multivariate generalized linear mixed models fitted with Markov chain Monte  
354 Carlo techniques (*MCMCglmm*) with 2,000,000 iterations and 500,000 burnins (*MCMCglmm*  
355 2.29, *MCMCglmm* function; Hadfield, 2010) to account for non-independence of pairwise  
356 distance data. We present results of the best model according to DIC for each SNP set.

357 After a first visual inspection of the genetic and geographic distance relationship, we  
358 fitted multiple simple linear functions (package *stats* 3.4.2, *lm* function; Chambers, 1992) to  
359 further characterize potential isolation by distance (IBD; Van Strien, Holderegger, & Van  
360 Heck, 2015) and to estimate the maximum geographic distance up to which gene flow as  
361 indicated by genetic differentiation might be prevalent compared to other genetic  
362 processes, such as genetic drift. One set of linear models included pairwise  $F_{ST}$  values as  
363 response variable and increasing geographic distance as explanatory variable, the other  
364 complementary set of linear models fitted  $F_{ST}$  against a constant for the difference in  
365 geographic distance to 100 km (i.e. the maximum distance between study populations). The



366 threshold for potential gene flow was estimated as the point where the sum of the residual  
367 standard errors of sets of complementary models stayed constant.

368

## 369 Results

370 Sequencing of ddRADseq fragments yielded on average about 150 M raw sequences per  
371 library, with on average about 1.2 M sequences per sample. SNP calling and quality filtering  
372 resulted in 4,588 SNPs. From those, 3,084 SNPs remained after excluding loci potentially in  
373 linkage equilibrium and with an excess of heterozygotes, in a total of 568 individuals from  
374 32 populations. The genotyping error of quality-filtered SNPs was 0.004. Negative controls  
375 did not result in sequences.

376 Putatively adaptive loci

377 From the 18 environmental variables describing the habitat of populations, six significantly  
378 (t-test,  $p \leq 0.05$ ) differed among the two habitat types (open and overgrown; Figure S 1):  
379 shrub coverage, light above and below the herbal layer, butterfly species richness and  
380 abundance, and plant species richness.

381 In the linear EAA, based on the number of clusters in the DAPC ( $K = 6$ , see below) and  
382 based on the fact that the inflation factor  $\lambda$  in un-adjusted  $p$  values did not vary  
383 considerably from  $K = 3-10$  in all environmental variables, we chose  $K = 6$  latent factors for  
384 the LFMM analysis. With an FDR of 0.05, we identified eight SNPs being associated to an  
385 environmental variable (Table S 1). Only three of them were associated to one of the six  
386 variables that significantly differed between the habitat types (butterfly abundance).

387 In the categorical EAA comparing the two habitat types, we identified 99 SNPs with the  
388 paired t-test ( $p \leq 0.05$ ), 95 with the Wilcoxon test ( $p \leq 0.05$ ), and 557 SNPs with the sign test.  
389 Seventy-four SNPs were identified in all three pairwise tests, but none of them overlapped  
390 with the three LFMM SNPs (Figure S 2). The 74 SNPs from categorical EAAs and the three  
391 SNPs from linear EAAs were used for further analyses (SNP\_adapt = 77 SNPs).

392 In the 77 SNPs that were putatively involved in adaptation to habitat type, 53 SNPs  
393 showed a decrease of the average beneficial AF (for the old, open habitat) in the new,  
394 overgrown compared to the open habitat (Figure 2). The binomial test revealed that this  
395 pattern was significantly different from a random expectation ( $p < 0.01$ ). However, AF  
396 differences between habitat types were small; average AF change was 0.09 (range 0.04-  
397 0.16) in the 53 SNPs with decreasing, and 0.08 (range 0.03-0.15) in the 24 SNPs with  
398 increasing beneficial AF. Yet, the maximum AF difference found between two populations of  
399 a pair in any SNP was 0.56 (Figure S 3).

400 The BayeScan analysis resulted in 391 potential  $F_{ST}$  outlier loci (SNP\_BayeScan). These  
401 SNPs, together with those from SNP\_adapt, were removed from the SNP\_overall to create  
402 SNP\_neutral (2619 loci). There was almost no overlap between SNP\_adapt and  
403 SNP\_BayeScan (Figure S 2).

404 Population genetic diversity

405 There was a significant interaction effect of habitat type and SNP set on observed  
406 heterozygosity ( $H_o$ ; Table 2). For SNP\_neutral,  $H_o$  ranged from 0.21 to 0.30 across all study  
407 populations (Table 1). There was no significant difference of  $H_o$  between populations in  
408 open and overgrown habitats (Figure 3a; post-hoc test:  $p = 0.91$ ). For SNP\_adapt,  $H_o$  ranged  
409 from 0.18 to 0.31 across all study populations (Table 1). Importantly, there was a significant

410 difference of  $H_o$  between populations in open and overgrown habitats (post-hoc test:  
411  $p < 0.05$ ), with populations in overgrown habitats exhibiting increased  $H_o$  compared to  
412 populations in open habitats (Figure 3a). The random factors region and population  
413 accounted for 45.1% and 32.8% of variation in the data for  $H_o$ .

414 For nucleotide diversity ( $\pi$ ), there was a marginally significant interaction effect of  
415 habitat type and SNP set ( $p = 0.056$ ; Table 2). For SNP\_neutral,  $\pi$  ranged from 0.0024 and  
416 0.0033 across all study populations (Table 1). There was no significant difference of  $\pi$   
417 between populations in open and overgrown habitats (Figure 3b; post-hoc test:  $p = 0.97$ ).  
418 For SNP\_adapt,  $\pi$  ranged from 0.0022 and 0.0032 across all study populations (Table 1).  $\pi$  of  
419 populations in overgrown habitats was higher than  $\pi$  of populations in open habitats, but  
420 this difference was not significant (Figure 3b; post-hoc test:  $p = 0.21$ ). The random factors  
421 region and population accounted for 0% and 68.4% of variation in the data for  $\pi$ .

422 Population genetic structure and potential gene flow

423 DAPC of SNP\_neutral identified six genetic clusters across the 32 populations with 200 PCs  
424 retained (Figure 4a). The first two discriminant functions from DAPC analysis and the  
425 hierarchical clustering tree analysis highlighted a differentiation by geographic regions,  
426 mainly by the islands Muhu and Saaremaa (Figure 4b,d). Importantly, the separation of  
427 genetic clusters was not based on habitat types (Figure 4c,d).

428 Pairwise  $F_{ST}$  values assessed using SNP\_neutral were mostly moderate with an average  
429 of 0.10 ( $\pm 0.05$  SD) ranging from 0.01 to 0.25. We found a positive significant relationship  
430 between pairwise  $F_{ST}$  and geographic distances among all populations ( $p_{MCMCglimm} < 0.001$ ;  
431 Table S 2), indicating isolation by distance (IBD; Figure 5). Model fitting showed that values  
432 of residual standard error (RSE) of the models roughly reached a plateau between 15 to

433 30 km in geographic distance between populations (Figure S 4), indicating a potential  
434 threshold up to where genetic differentiation is driven by geographic distance and gene flow  
435 rather than random (genetic) processes. The habitat type did not explain patterns in genetic  
436 differentiation (Table S 2).

437 Results of all analyses using SNP\_overall were highly similar to when using SNP\_neutral.  
438 For completeness, these results are presented as supplemental information (Table S 2 – S 4,  
439 Figure S 4 – S 7).

440

## 441 Discussion

442 Habitat degradation due to abandoned management and related loss and isolation of  
443 European semi-natural grasslands (Auffret et al., 2018; Habel et al., 2013) during the last  
444 century has been shown to negatively impact the biodiversity of these grasslands, both at  
445 the species and the genetic level (e.g. Helm et al., 2006; Picó & Van Groenendael, 2007). Yet,  
446 the effect of abandoned management, which can result in gradual overgrowth of grasslands  
447 with woody vegetation, on the genetic diversity at adaptive loci of grassland plants has  
448 remained unknown. Here, we examined the effect of recent overgrowth of abandoned  
449 semi-natural calcareous grasslands (Estonian alvars) on the genetic diversity at putatively  
450 neutral and adaptive loci of the perennial herb *Primula veris*. Our study revealed that *P.*  
451 *veris* populations in the new, overgrown habitats had a similar level of genetic diversity at  
452 putatively neutral loci as in the old, open habitats, despite substantial change in  
453 environmental conditions. Genetic diversity at putatively adaptive loci, however, was higher  
454 in the new, overgrown compared to the old, open habitats. Neutral genetic structure and  
455 gene flow as indicated by neutral genetic differentiation was not (yet) affected by grassland

456 overgrowth. We are among the first to demonstrate how recently changed non-climatic  
457 selection pressures are in the process of changing adaptive genetic patterns of wild  
458 populations. Most other studies concentrated on the effects of climate on plants (e.g.  
459 Dauphin et al., 2020; Sun et al., 2020) or used manipulative experiments in otherwise  
460 natural habitats (Laurentino et al., 2020). Hence, our study is an example of *in-situ*  
461 “adaptation in action”, where genetic diversity at adaptive loci is increasing due to a slow  
462 loss of previous genetic adaptations.

463 Overgrowth of semi-natural grasslands has often a negative impact on genetic diversity  
464 of grassland-specialist plants due to lower habitat quality and potential creation of barriers  
465 for gene flow (Aavik & Helm, 2018; Picó & Van Groenendael, 2007). However, in our study,  
466 neutral genetic diversity of *P. veris* was similar in the open and the overgrown habitats,  
467 indicating that habitat and landscape change do not necessarily restrict gene flow among  
468 populations of *P. veris*. On the other hand, an environmental impact on the neutral part of a  
469 genome might only show after several generations (e.g. Landguth et al., 2010). *Primula veris*  
470 is a perennial plant with an average lifespan of up to 50 years and can persist with reduced  
471 reproduction even when the environment has changed as a consequence of overgrowth  
472 (Ehrlén & Lehtilä, 2002). Hence, genetic diversity of such populations potentially reflects the  
473 state before their habitats started to change (Reinula, 2018). In addition, heterozygosity  
474 indices, as used in our study, have been suggested to respond more slowly to environmental  
475 change as compared to, for example, measures of inbreeding (Lloyd, Campbell, & Neel,  
476 2013; Lowe, Boshier, Ward, Bacles, & Navarro, 2005). Deschepper et al. (2017), who  
477 examined patterns of neutral genetic diversity of *P. veris* in grassland and forest populations  
478 in Belgium, also reported no significant difference in  $H_o$  between habitat types. Yet, their  
479 study system, i.e. forests, represents a late-successional stage, whereas ours represents a

480 mid-successional stage (shrubby overgrowth). Consequently, neutral genetic patterns of *P.*  
481 *veris* might need a very long time (up to centuries) to reach an equilibrium with the new  
482 overgrown environment.

483 In contrast to genetic diversity at putatively neutral loci, genetic diversity assessed at  
484 putatively adaptive loci differed between habitat types in our study. Populations in recently  
485 overgrown grasslands showed higher genetic diversity at putatively adaptive loci compared  
486 to populations in open grasslands (Figure 3a,b). This is most likely caused by new selection  
487 pressures in the new, overgrown habitats compared to the old, open habitats. The open  
488 grasslands used in our study have been in an open state for several hundreds of years,  
489 whereas ongoing overgrowth started only about 90 years ago (Helm et al., 2006). Hence,  
490 populations of *P. veris* in open grasslands experienced homogenous selection pressures for  
491 a very long time, which increased the frequencies of alleles beneficial for an open habitat  
492 and led to reduced heterozygosity and genetic diversity at adaptive loci. The majority of the  
493 putatively adaptive SNPs (53 out of 77) exhibited a smaller average beneficial (i.e. major) AF  
494 for open habitat conditions in populations from the new, overgrown compared to those  
495 from the old habitat. This led to an increase in heterozygosity and genetic diversity in  
496 populations of the new, overgrown habitats (Figure 2). Considering *P. veris*' potential  
497 longevity, this indicates that populations in overgrown habitats are still adapting to their  
498 new selection pressures (e.g. lower light availability, reduced or altered pollinator  
499 community), i.e. many alleles potentially beneficial for the new, overgrown habitat are still  
500 far from fixation (i.e. homozygosity). Consequently, the genetic diversity at putatively  
501 adaptive loci of *P. veris* populations in overgrown grasslands has not yet been reduced. A  
502 similar pattern was found in the conifer tree *Pinus cembra*, where populations in the core of  
503 the current niche exhibited a decreased genetic diversity at adaptive loci, but no difference

504 in the one at neutral loci, compared to populations at the niche margin, which most likely  
505 present unstable or novel habitats (Dauphin et al., 2020).

506 An increase of non-beneficial alleles for the open habitat in the overgrown populations,  
507 and thus an increase in genetic diversity and heterozygosity at putatively adaptive loci in  
508 overgrown populations, can be achieved in two ways: (1) the alternative alleles at SNP loci  
509 were either already present in lower frequencies in populations of open habitats (i.e.  
510 standing genetic variation), or (2) arrived to overgrowing grasslands by gene flow, before  
511 they were subject to positive selection in the overgrown habitat. As shown in Figure S 3,  
512 beneficial alleles in populations of the open habitat were rarely fixed, strongly pointing  
513 towards the importance of standing genetic variation. This implies that even populations  
514 with reduced genetic diversity at putatively adaptive loci (e.g. in open grasslands) may  
515 possess the ability to react to habitat changes due to the low, but crucial amount of  
516 standing genetic variation (e.g. Morris, Bowles, Allen, Jamniczky, & Rogers, 2018). Still, we  
517 found gene flow as indicated by genetic differentiation potentially spreading alleles  
518 between habitats which, in theory, can contribute to the increased genetic diversity at  
519 adaptive loci in overgrown populations. The potential gene flow distances found in our  
520 study (up to 30 km; Figure 4, Figure 5) stand in marked contrast to the potential dispersal  
521 ranges of pollen and seeds of *P. veris* for which very short distances up to 12 m and 0.5 m,  
522 respectively, have been found (Antrobus & Lack, 1993; Richards & Ibrahim, 1978). Yet,  
523 pollinating insects of *P. veris* have been shown to occasionally travel up to 2 km (Kreyer,  
524 Oed, Walther-Hellwig, & Frankl, 2004; Zurbuchen, Bachofen, Müller, Hein, & Dorn, 2010)  
525 and dispersal distances are often underestimated in ecological studies (e.g. Bullock, Shea, &  
526 Skarpaas, 2006). Historical rotational grazing of domestic animals and movement of wild  
527 animals (e.g. deer, moose, wild boar) might also have facilitated seed dispersal for longer

528 distances even for *P. veris* which is not adapted to zoochory (Plue, Aavik, & Cousins, 2019).  
529 Overall, especially standing genetic variation but also gene flow are capable of supplying *P.*  
530 *veris* populations undergoing habitat changes with new or alternative alleles fostering  
531 adaptation to new habitat conditions in our study region.

532       Importantly, the fact that we detected a significant effect of habitat type on genetic  
533 diversity ( $H_o$ ) when using the putatively adaptive SNP set but not with the neutral SNP set  
534 emphasizes the need to examine genetic diversity at neutral and adaptive loci separately  
535 when studying the genetic response of plant species to environmental changes. Besides, in  
536 the overall SNP set (Figure S 7), there was no significant effect of habitat type on genetic  
537 diversity, which indicates that genetic diversity of an overall SNP set represents rather  
538 neutral genetic patterns (Dauphin et al., 2020). In conservation genetics and restoration,  
539 most assessments have been based on overall or neutral genetic diversity so far (González  
540 et al., 2019; Wei & Jiang, 2020), even though it is most likely the putatively adaptive regions  
541 of a genome that are important for the fate of a population in a changed environment.

542       The different effects of habitat type on genetic diversity at putatively neutral and  
543 adaptive loci could partly be due to the unevenness in the number of loci at neutral and  
544 putatively adaptive regions (2,619 versus 77, respectively). However, the ddRADseq  
545 procedure used in our study should result in a “random” and representative subset of both,  
546 neutral and adaptive SNPs. Here, we were not particularly interested in the actual molecular  
547 mechanisms underlying adaptation, but in general patterns at putatively adaptive loci,  
548 which should also become visible with 77 SNPs if these patterns are of substantial nature.  
549 Additionally, the reliability of the detected SNPs can be assumed high, because the  
550 genotyping error for our SNPs was low (0.004) and the SNP sets were identified using a draft



551 genome (Hoban et al., 2016), which covers about 63% of the whole 479.22 Mb genome of  
552 the study species *P. veris* (Nowak et al., 2015).

553 In addition to genetic diversity, population size is another factor that is affected by  
554 habitat change, and which also directly influences genetic diversity (Leimu et al., 2006). The  
555 census sizes of our *P. veris* populations were similar in open and overgrown habitats and  
556 were not associated with genetic diversity at neutral and adaptive loci. In contrast to our  
557 results, a meta-analysis showed a clear relationship between population size and (neutral)  
558 genetic diversity, including long-lived and self-incompatible plant species, such as *P. veris*  
559 (Leimu et al., 2006). Populations in our study exhibited a minimum of about 100 individuals,  
560 which is larger than the overall census for small populations in the study by Leimu et al.  
561 (2006). Consequently, our *P. veris* populations might be still sufficiently large to counteract  
562 population size driven effects on genetic diversity.

## 563 Conclusions

564 Our landscape genomic investigation of *Primula veris* in Estonian semi-natural grasslands is  
565 one of the first to demonstrate the effects of land use change on the genetic diversity at  
566 putatively adaptive loci of *in-situ* wild plant species. We show that the effect of recent  
567 overgrowth of grasslands is not genetically manifested when considering neutral SNPs, even  
568 after almost a century of ongoing environmental changes. Yet, genetic diversity assessed at  
569 putatively adaptive loci was higher in populations in overgrown compared to open habitats,  
570 most probably due to allele frequency changes of standing genetic variation. Thus, even  
571 populations in degraded and fragmented habitats may possess the ability to adapt to  
572 habitat changes due to their important standing genetic variation in addition to potential  
573 allele immigration due to gene flow.

574 For perennial long-lived plant species, such as *P. veris*, long time spans might pass  
575 before habitat change can be detected at neutral regions of the genome whereas habitat  
576 effects at adaptive loci could be noticeable much faster. Consequently, a repeated  
577 monitoring of genetic diversity at both neutral and adaptive loci and further investigations  
578 of contemporary gene flow at different spatial scales would be highly valuable to identify  
579 potential genetic consequences of recent and ongoing environmental change in natural and  
580 semi-natural habitats. In addition, extending our results to whole-genome and targeted  
581 sequencing approaches would be vital to reliably identify genes and gene networks  
582 putatively involved in the adaptation of *P. veris* to habitat change, and to assess the relative  
583 importance of loss of previous and gain of new genetic adaptations to the altered  
584 environment.

585

## 586 Acknowledgements

587 We thank the Genetic Diversity Centre Zurich (GDC) for laboratory support, the Functional  
588 Genomic Centre Zurich (FGCZ) for Illumina sequencing, A. Rogivue for introducing the lead  
589 author to EAA, and B. Dauphin for extracting climate data and support in EAAs. We are  
590 grateful for financial support from the Estonian Research Council (MOBJD427, PUT589 and  
591 PRG874), the COST “G-BIKE” action (CA18134), the European Regional Development Fund  
592 (Centre of Excellence EcolChange), and European Commission LIFE+ Nature program  
593 (LIFE13NAT/EE/000082). We also thank three anonymous reviewers for their valuable  
594 comments and suggestions on previous versions of this manuscript.

## 595 References

- 596 Aavik, T., & Helm, A. (2018). Restoration of plant species and genetic diversity depends on  
597 landscape-scale dispersal. *Restoration Ecology*, *26*, S92-S102. doi: 10.1111/rec.12634
- 598 Aavik, T., Thetloff, M., Träger, S., Hernández-Agramonte, I. M., Reinula, I., & Pärtel, M.  
599 (2019). Delayed and immediate effects of habitat loss on the genetic diversity of the  
600 grassland plant *Trifolium montanum*. *Biodiversity and Conservation*, *28*, 3299-3319. doi:  
601 10.1007/s10531-019-01822-8
- 602 Antrobus, S., & Lack, A. J. (1993). Genetics of colonizing and established populations of  
603 *Primula veris*. *Heredity*, *71*, 252–258. doi: 10.1038/hdy.1993.133
- 604 Auffret, A. G., Kimberley, A., Plue, J., & Waldén, E. (2018) Super-regional land-use change  
605 and effects on the grassland specialist flora. *Nature communications*, *9*, 3464. doi:  
606 10.1038/s41467-018-05991-y.
- 607 Barrett, R. D. H., & Schluter, D. (2008). Adaptation from standing genetic variation. *Trends in*  
608 *Ecology and Evolution*, *23*, 38–44. doi: 10.1016/j.tree.2007.09.008
- 609 Benjamini, Y., & Hochberg, Y. (1995). Controlling the false discovery rate: a practical and  
610 powerful approach to multiple testing. *Journal of the Royal Statistical Society: Series B*  
611 *(Methodological)*, *57*, 289–300. doi: 10.1111/j.2517-6161.1995.tb02031.x
- 612 Bilska, K., & Szczecińska, M. (2016). Comparison of the effectiveness of ISJ and SSR markers  
613 and detection of outlier loci in conservation genetics of *Pulsatilla patens* populations.  
614 *PeerJ*, *4*, e2504. doi: 10.7717/peerj.2504
- 615 Bolger, A. M., Lohse, M., & Usadel, B. (2014). Trimmomatic: a flexible trimmer for Illumina  
616 sequence data. *Bioinformatics*, *30*, 2114–2120. doi: 10.1093/bioinformatics/btu170
- 617 Brys, R., & Jacquemyn, H. (2009). Biological Flora of the British Isles: *Primula veris* L. *Journal of*  
618 *Ecology*, *97*, 581–600. doi: 10.1111/j.1365-2745.2009.01495.x
- 619 Bullock, J. M., Shea, K., & Skarpaas, O. (2006). Measuring plant dispersal: an introduction to  
620 field methods and experimental design. *Plant Ecology*, *186*, 217–234. doi:  
621 10.1007/s11258-006-9124-5
- 622 Catchen, J. M., Amores, A., Hohenlohe, P., Cresko, W., Postlethwait, J. H., & De Koning, D.-J.  
623 (2011). Stacks: building and genotyping loci de novo from short-read sequences. *G3:*  
624 *Genes/Genomes/Genetics*, *1*(3), 171–182. doi: 10.1534/g3.111.000240
- 625 Catchen, J. M., Hohenlohe, P. A., Bassham, S., Amores, A., & Cresko, W. A. (2013). Stacks: an  
626 analysis tool set for population genomics. *Molecular Ecology*, *22*, 3124–3140. doi:  
627 10.1111/mec.12354
- 628 Caye, K., Jumentier, B., Lepeule, J., & François, O. (2019). LFMM 2: Fast and accurate  
629 inference of gene-environment associations in genome-wide studies. *Molecular Biology*  
630 *and Evolution*, *36*, 852–860. doi: 10.1093/molbev/msz008
- 631 Chambers, J. M. (1992). Linear models. In J. M. Chambers & T. J. Hastie (Eds.), *Statistical*  
632 *Models in S*. Wadsworth & Brooks/Cole.
- 633 Cheptou, P.-O., Hargreaves, A. L., Bonte, D., & Jacquemyn, H. (2017). Adaptation to  
634 fragmentation: evolutionary dynamics driven by human influences. *Philosophical*

- 635 *Transactions of the Royal Society B: Biological Sciences*, 372, 20160037. doi:  
636 10.1098/rstb.2016.0037
- 637 Coop, G., Witonsky, D., Di Rienzo, A., & Pritchard, J. K. (2010). Using environmental  
638 correlations to identify loci underlying local adaptation. *Genetics*, 185, 1411–1423. doi:  
639 10.1534/genetics.110.114819
- 640 Cousins, S. A. O., Auffret, A. G., Lindgren, J., & Tränk, L. (2015). Regional-scale land-cover  
641 change during the 20th century and its consequences for biodiversity. *AMBIO*, 44, 17–  
642 27. doi: 10.1007/s13280-014-0585-9
- 643 Danecek, P., Auton, A., Abecasis, G., Albers, C. A., Banks, E., DePristo, M. A., ... Durbin, R.  
644 (2011). The variant call format and VCFtools. *Bioinformatics*, 27, 2156–2158. doi:  
645 10.1093/bioinformatics/btr330
- 646 Dauphin, B., Wüest, R. O., Brodbeck, S., Zoller, S., Fischer, M. C., Holderegger, R., ... Rellstab,  
647 C. (2020). Disentangling the effects of geographic peripherality and habitat suitability on  
648 neutral and adaptive genetic variation in Swiss stone pine. *Molecular Ecology*, 29, 1972–  
649 1989. doi: 10.1111/mec.15467
- 650 Davey, J. W., Hohenlohe, P. A., Etter, P. D., Boone, J. Q., Catchen, J. M., & Blaxter, M. L.  
651 (2011). Genome-wide genetic marker discovery and genotyping using next-generation  
652 sequencing. *Nature Reviews Genetics*, 12, 499–510. doi: 10.1038/nrg3012
- 653 de Mita, S., Thuillet, A.-C., Gay, L., Ahmadi, N., Manel, S., Ronfort, J., & Vigouroux, Y. (2013).  
654 Detecting selection along environmental gradients: analysis of eight methods and their  
655 effectiveness for outbreeding and selfing populations. *Molecular Ecology*, 22, 1383–  
656 1399. doi: 10.1111/mec.12182
- 657 Deschepper, P., Brys, R., & Jacquemyn, H. (2018). The impact of flower morphology and  
658 pollinator community composition on pollen transfer in the distylous *Primula veris*.  
659 *Botanical Journal of the Linnean Society*, 186, 414–424. doi: 10.1093/botlinnean/box097
- 660 DiLeo, M. F., Holderegger, R., & Wagner, H. H. (2018). Contemporary pollen flow as a  
661 multiscale process: Evidence from the insect-pollinated herb *Pulsatilla vulgaris*. *Journal*  
662 *of Ecology*, 0–3. doi: 10.1111/1365-2745.12992
- 663 Ehrlén, J., & Lehtilä, K. (2002). How perennial are perennial plants? *Oikos*, 98(2), 308–322.
- 664 Exposito-Alonso, M., 500 Genomes Field Experiment Team, Burbano, H. A., Bossdorf, O.,  
665 Nielsen, R., & Weigel, D. (2019). Natural selection on the *Arabidopsis thaliana* genome  
666 in present and future climates. *Nature*, 573, 126–129. doi: 10.1038/s41586-019-1520-9
- 667 EWS. (2020). Estonian Weather Service. <http://www.ilmateenistus.ee>
- 668 Foll, M., & Gaggiotti, O. (2008). A genome-scan method to identify selected loci appropriate  
669 for both dominant and codominant markers: a Bayesian perspective. *Genetics*, 180,  
670 977–993. doi: 10.1534/genetics.108.092221
- 671 François, O., Martins, H., Caye, K., & Schoville, S. D. (2016). Controlling false discoveries in  
672 genome scans for selection. *Molecular Ecology*, 25, 454–469. doi: 10.1111/mec.13513
- 673 Frankham, R. (2005). Genetics and extinction. *Biological Conservation*, 126, 131–140. doi:  
674 10.1016/j.biocon.2005.05.002

- 675 Garrison, E., & Marth, G. (2012). Haplotype-based variant detection from short-read  
676 sequencing. *ArXiv*, 1207.3907. doi: arXiv:1207.3907 [q-bio.GN]
- 677 González, A. V., Gómez-Silva, V., Ramírez, M. J., Fontúrbel, F. E. (2019). Meta-analysis of the  
678 differential effects of habitat fragmentation and degradation on plant genetic diversity.  
679 *Conservation Biology*, 34, 711–720. doi: 10.1111/cobi.13422
- 680 Habel, J. C., Dengler, J., Janišová, M., Török, P., Wellstein, C., & Wiezik, M. (2013). European  
681 grassland ecosystems: threatened hotspots of biodiversity. *Biodiversity and  
682 Conservation*, 22, 2131–2138. doi: 10.1007/s10531-013-0537-x
- 683 Hadfield, J. D. (2010). MCMC methods for multi-response generalized linear mixed models:  
684 the MCMCglmm R package. *Journal of Statistical Software*, 33, 1–22. doi:  
685 10.1002/ana.22635
- 686 Hamrick, J. L., & Godt, M. J. W. (1996). Effects of life history traits on genetic diversity in  
687 plant species. *Philosophical Transactions: Biological Sciences*, 351, 1291–1298. doi:  
688 10.1098/rstb.1996.0112
- 689 Helm, A. (2019). *Large-scale restoration of Estonian alvar grasslands: impact on biodiversity  
690 and ecosystem services - Final report of the Action D.1. Biodiversity monitoring for  
691 project LIFE to Alvars (LIFE13NAT/EE/000082)*.  
692 [https://life.envir.ee/sites/default/files/pictures/LIFE\\_to\\_Alvars\\_Report\\_Biodiversity\\_mo  
693 nitoring\\_submitted.pdf](https://life.envir.ee/sites/default/files/pictures/LIFE_to_Alvars_Report_Biodiversity_monitoring_submitted.pdf)
- 694 Helm, A., Hanski, I., & Pärtel, M. (2006). Slow response of plant species richness to habitat  
695 loss and fragmentation. *Ecology Letters*, 9, 72–77. doi: 10.1111/j.1461-  
696 0248.2005.00841.x
- 697 Hoban, S., Kelley, J. L., Lotterhos, K. E., Antolin, M. F., Bradburd, G., Lowry, D. B., ... Whitlock,  
698 M. C. (2016). Finding the genomic basis of local adaptation: pitfalls, practical solutions,  
699 and future directions. *The American Naturalist*, 188, 379–397. doi: 10.1086/688018
- 700 Honnay, O., & Jacquemyn, H. (2007). Susceptibility of common and rare plant species to the  
701 genetic consequences of habitat fragmentation. *Conservation Biology*, 21, 823–831. doi:  
702 10.1111/j.1523-1739.2006.00646.x
- 703 Hooftman, D. A. P., & Bullock, J. M. (2012). Mapping to inform conservation: a case study of  
704 changes in semi-natural habitats and their connectivity over 70 years. *Biological  
705 Conservation*, 145, 30–38. doi: 10.1016/j.biocon.2011.09.015
- 706 IPBES. (2018). *Summary for policymakers of the regional assessment report on biodiversity  
707 and 24 ecosystem services for Europe and Central Asia of the Intergovernmental Science-  
708 Policy Platform on 25 Biodiversity and Ecosystem Services*. Fischer, M., M. Rounsevell, A.  
709 Torre-Marín Rando, A. Mader, A. Church, M. Elbakidze, V. Elias, H. T., P. A. Harrison, J.  
710 Hauck, B. Martín-López, I. Ring, C. Sandström, I. Sousa Pinto, P. Visconti, and N. E.  
711 Zimmermann: IPBES secretariat, Bonn, Germany.
- 712 IPCC. (2019). *Climate Change and Land: an IPCC special report on climate change,  
713 desertification, land degradation, sustainable land management, food security, and  
714 greenhouse gas fluxes in terrestrial ecosystems*. P. R. Shukla, J. Skea, E. Calvo Buendia, V.  
715 Masson-Delmotte, H.-O. Pörtner, D. C. Roberts, P. Zhai, R. Slade, S. Connors, R. van  
716 Diemen, M. Ferrat, E. Haughey, S. Luz, S. Neogi, M. Pathak, J. Petzold, J. Portugal  
717 Pereira, P. Vyas, E. Huntley, K. Kissick, M. Belkacemi, J. Malley, (eds.).

- 718 Jombart, T. (2008). Adegenet: a R package for the multivariate analysis of genetic markers.  
719 *Bioinformatics*, *24*, 1403–1405. doi: 10.1093/bioinformatics/btn129
- 720 Jombart, T., Devillard, S., & Balloux, F. (2010). Discriminant analysis of principal components:  
721 a new method for the analysis of genetically structured populations. *BMC Genetics*, *11*.  
722 doi: <https://doi.org/10.1186/1471-2156-11-94>
- 723 Kamvar, Z. N., Tabima, J. F., Everhart, S. E., Brooks, J. C., Krueger-Hadfield, S. A., Sotka, E., ...  
724 Grünwald, N. J. (2019). *poppr - Genetic analysis of populations with mixed reproduction*.
- 725 Karger, D. N., Conrad, O., Böhner, J., Kawohl, T., Kreft, H., Soria-Auza, R. W., ... Kessler, M.  
726 (2017). Climatologies at high resolution for the earth's land surface areas. *Scientific*  
727 *Data*, *4*, 170122. doi: 10.1038/sdata.2017.122
- 728 Kreyer, D., Oed, A., Walther-Hellwig, K., & Frankl, R. (2004). Are forests potential landscape  
729 barriers for foraging bumblebees? Landscape scale experiments with *Bombus terrestris*  
730 *agg.* and *Bombus pascuorum* (Hymenoptera, Apidae). *Biological Conservation*, *116*, 111-  
731 118. doi: 10.1016/S0006-3207(03)00182-4
- 732 Kuznetsova, A., Brockhoff, P. B., & Christensen, R. H. B. (2017). lmerTest Package: Tests in  
733 linear mixed effects models. *Journal of Statistical Software*, *82*, 1–26. doi:  
734 10.18637/jss.v082.i13
- 735 Landguth, E. L., Cushman, S. A., Schwartz, M. K., McKelvey, K. S., Murphy, M., & Luikart, G.  
736 (2010). Quantifying the lag time to detect barriers in landscape genetics. *Molecular*  
737 *Ecology*, *19*, 4179–4191. doi: 10.1111/j.1365-294X.2010.04808.x
- 738 Laurentino, T. G., Moser, D., Roesti, M., Ammann, M., Frey, A., Ronco, F., Kueng, B., &  
739 Berner, D. (2020). Genomic release-recapture experiment in the wild reveals within-  
740 generation polygenic selection in stickleback fish. *Nature Communications*, *11*, 1928.  
741 doi: 10.1038/s41467-020-15657-3
- 742 Lehtilä, K., Dahlgren, J. P., Garcia, M. B., Leimu, R., Syrjänen, K., & Ehrlén, J. (2016). Forest  
743 succession and population viability of grassland plants: long repayment of extinction  
744 debt in *Primula veris*. *Oecologia*, *181*, 125–135. doi: 10.1007/s00442-016-3569-6
- 745 Leimu, R., Mutikainen, P., Koricheva, J., & Fischer, M. (2006). How general are positive  
746 relationships between plant population size, fitness and genetic variation? *Journal of*  
747 *Ecology*, *94*, 942–952. doi: 10.1111/j.1365-2745.2006.01150.x
- 748 Lenth, R. V. (2016). Least-squares means: The R package *lsmeans*. *Journal of Statistical*  
749 *Software*, *69*, 1-33. doi: 10.18637/jss.v069.i01
- 750 Li, H. (2013). Aligning sequence reads, clone sequences and assembly contigs with BWA-  
751 MEM. *ArXiv*, 1303.3997. doi: arXiv:1303.3997 [q-bio.GN]
- 752 Lloyd, M. W., Campbell, L., & Neel, M. C. (2013). The power to detect recent fragmentation  
753 events using genetic differentiation methods. *PLoS ONE*, *8*, e63981. doi:  
754 10.1371/journal.pone.0063981
- 755 Lotterhos, K. E., & Whitlock, M. C. (2015). The relative power of genome scans to detect  
756 local adaptation depends on sampling design and statistical method. *Molecular Ecology*,  
757 *24*, 1031–1046. doi: 10.1111/mec.13100

- 758 Lowe, A. J., Boshier, D., Ward, M., Bacles, C. F. E., & Navarro, C. (2005). Genetic resource  
759 impacts of habitat loss and degradation; reconciling empirical evidence and predicted  
760 theory for neotropical trees. *Heredity*, *95*, 255–273. doi: 10.1038/sj.hdy.6800725
- 761 Metzker, M. L. (2010). Sequencing technologies — the next generation. *Nature Reviews*  
762 *Genetics*, *11*, 31–46. doi: 10.1038/nrg2626
- 763 Milot, E., Béchet, A., & Maris, V. (2020) The dimensions of evolutionary potential in  
764 biological conservation. *Evolutionary Applications*, *13*, 1363–1379. doi:  
765 10.1111/eva.12995
- 766 Morris, M. R. J., Bowles, E., Allen, B. E., Jamniczky, H. A., & Rogers, S. M. (2018).  
767 Contemporary ancestor? Adaptive divergence from standing genetic variation in Pacific  
768 marine threespine stickleback. *BMC Evolutionary Biology*, *18*, 113. doi: 10.1186/s12862-  
769 018-1228-8
- 770 Nei, M., Suzuki, Y., & Nozawa, M. (2010). The neutral theory of molecular evolution in the  
771 genomic era. *Annual Review of Genomics and Human Genetics*, *11*, 265–289. doi:  
772 10.1146/annurev-genom-082908-150129
- 773 Nowak, M. D., Russo, G., Schlapbach, R., Huu, C., Lenhard, M., & Conti, E. (2015). The draft  
774 genome of *Primula veris* yields insights into the molecular basis of heterostyly. *Genome*  
775 *Biology*, *16*, 12. doi: 10.1186/s13059-014-0567-z
- 776 Peakall, R., & Smouse, P. E. (2012). GenAEx 6.5: genetic analysis in Excel. Population genetic  
777 software for teaching and research — an update. *Bioinformatics*, *28*, 2537–2539. doi:  
778 10.1093/bioinformatics/bts460
- 779 Peterson, B. K., Weber, J. N., Kay, E. H., Fisher, H. S., & Hoekstra, H. E. (2012). Double digest  
780 RADseq: an inexpensive method for de novo SNP discovery and genotyping in model  
781 and non-model species. *PLoS ONE*, *7*. doi: 10.1371/journal.pone.0037135
- 782 Picó, F. X., & Van Groenendael, J. (2007). Large-scale plant conservation in European semi-  
783 natural grasslands: a population genetic perspective. *Diversity and Distributions*, *13*,  
784 920–926. doi: 10.1111/j.1472-4642.2007.00349.x
- 785 Plue, J., Aavik, T., & Cousins, S. A. O. (2019). Grazing networks promote plant functional  
786 connectivity among isolated grassland communities. *Diversity and Distributions*, *25*,  
787 102–115. doi: 10.1111/ddi.12842
- 788 Pollard, E. (1977). A method for assessing changes in the abundance of butterflies. *Biological*  
789 *Conservation*, *12*, 115–134.
- 790 Prangel, E. (2017). *The provisioning of ecosystem services on open and successional alvar*  
791 *grasslands* (Msc thesis). University of Tartu, Tartu.
- 792 Puritz, J. B., Hollenbeck, C. M., & Gold, J. R. (2014). dDocent: a RADseq, variant-calling  
793 pipeline designed for population genomics of non-model organisms. *PeerJ*, *2*, e431. doi:  
794 10.7717/peerj.431
- 795 Puritz, J. B., Matz, M. V., Toonen, R. J., Weber, J. N., Bolnick, D. I., & Bird, C. E. (2014).  
796 Demystifying the RAD fad. *Molecular Ecology*, *23*, 5937–5942. doi: 10.1111/mec.12965
- 797 R Development Core Team. (2017). *R: A language and environment for statistical computing*  
798 (3.2.3). Vienna: R Foundation for Statistical Computing.

- 799 Radwan, J., & Babik, W. (2012). The genomics of adaptation. *Proceedings of the Royal*  
800 *Society B: Biological Sciences*, 279, 5024–5028. doi: 10.1098/rspb.2012.2322
- 801 Reinula, I. (2018). *The impact of landscape change on the genetic diversity of the grassland*  
802 *plant Primula veris* (Msc thesis). University of Tartu, Tartu.
- 803 Rellstab, C., Gugerli, F., Eckert, A. J., Hancock, A. M., & Holderegger, R. (2015). A practical  
804 guide to environmental association analysis in landscape genomics. *Molecular Ecology*,  
805 24, 4348–4370. doi: 10.1111/mec.13322
- 806 Rellstab, C., Zoller, S., Walthert, L., Lesur, I., Pluess, A. R., Graf, R., ... Gugerli, F. (2016).  
807 Signatures of local adaptation in candidate genes of oaks (*Quercus* spp.) with respect to  
808 present and future climatic conditions. *Molecular Ecology*, 25, 5907–5924. doi:  
809 10.1111/mec.13889
- 810 Richards, A. J., & Ibrahim, H. (1978). Estimation of neighbourhood size in two populations of  
811 *Primula veris*. In A. J. Richards (Ed.), *The pollination of flowers by insects* (pp. 165–174).  
812 London, UK: Academic Press.
- 813 Rousset, F., Lopez, J., & Belkhir, K. (2017). *genepop - Population genetic data analysis using*  
814 *genepop*.
- 815 Slatkin, M. (1985). Gene flow in natural populations. *Annual Review of Ecology and*  
816 *Systematics*, 16, 393–430. doi: doi:10.1146/annurev.es.16.110185.002141
- 817 Smith, A. L., Hodkinson, T. R., Villellas, J., Catford, J. A., Csergő, A. M., Blomberg, S. P., ...  
818 Buckley, Y. M. (2020). Global gene flow releases invasive plants from environmental  
819 constraints on genetic diversity. *Proceedings of the National Academy of Sciences*, 117,  
820 4218–4227. doi: 10.1073/pnas.1915848117
- 821 Stoeckel, S., Grange, J., Fernández-Manjarres, J. F., Bilger, I., Frascaria-Lacoste, N., &  
822 Mariette, S. (2006). Heterozygote excess in a self-incompatible and partially clonal  
823 forest tree species — *Prunus avium* L. *Molecular Ecology*, 15, 2109–2118. doi:  
824 10.1111/j.1365-294X.2006.02926.x
- 825 Sun, Y., Bossdorf, O., Grados, R. D., Liao, Z., & Müller-Schärer, H. (2020) Rapid genomic and  
826 phenotypic change in response to climate warming in a widespread plant invader.  
827 *Global Change Biology*, 26, 6511-6522. doi: 10.1111/gcb.15291
- 828 Tewksbury, J. J., Levey, D. J., Haddad, N. M., Sargent, S., Orrock, J. L., Weldon, A., ...  
829 Townsend, P. (2002). Corridors affect plants, animals, and their interactions in  
830 fragmented landscapes. *Proceedings of the National Academy of Sciences*, 99, 12923–  
831 12926. doi: 10.1073/pnas.202242699
- 832 Van Strien, M. J., Holderegger, R., & Van Heck, H. J. (2015). Isolation-by-distance in  
833 landscapes: considerations for landscape genetics. *Heredity*, 114, 27–37. doi:  
834 10.1038/hdy.2014.62
- 835 Wedderburn, F., & Richards, A. J. (1990). Variation in within-morph incompatibility  
836 inhibition sites in heteromorphic *Primula* L. *New Phytologist*, 116, 149–162.
- 837 Wegmann Lab. (2019). TIGER - tools to estimate genotyping errors (Version 1.0).  
838 <https://bitbucket.org/wegmannlab/tiger/wiki/Home>



839 Wei, X., & Jiang, M. (2020). Meta-analysis of genetic representativeness of plant populations  
840 under ex situ conservation in contrast to wild source populations. *Conservation Biology*.  
841 doi: 10.1111/cobi.13617

842 Westergaard, K. B., Zemp, N., Bruederle, L. P., Stenøien, H. K., Widmer, A., & Fior, S. (2019).  
843 Population genomic evidence for plant glacial survival in Scandinavia. *Molecular*  
844 *Ecology*, 28, 818–832. doi: 10.1111/mec.14994

845 Wilson, J. B., Peet, R. K., Dengler, J., & Pärtel, M. (2012). Plant species richness: the world  
846 records. *Journal of Vegetation Science*, 23, 796–802. doi: 10.1111/j.1654-  
847 1103.2012.01400.x

848 Xuereb, A., Kimber, C. M., Curtis, J. M. R., Bernatchez, L., & Fortin, M. J. (2018). Putatively  
849 adaptive genetic variation in the giant California sea cucumber (*Parastichopus*  
850 *californicus*) as revealed by environmental association analysis of restriction-site  
851 associated DNA sequencing data. *Molecular Ecology*, 27, 5035–5048. doi:  
852 10.1111/mec.14942

853 Zurbuchen, A., Bachofen, C., Müller, A., Hein, S., & Dorn, S. (2010). Are landscape structures  
854 insurmountable barriers for foraging bees? A mark-recapture study with two solitary  
855 pollen specialist species. *Apidologie*, 41, 497–508. doi: 10.1051/apido/2009084

856

#### 857 Data Accessibility

858 Sequence data used in this study will be made available at the European Nucleotide Archive  
859 (ENA) upon acceptance (ERS5253979 – ERS5254546). R-scripts, genotypic and  
860 environmental data will be provided at the Dryad Digital Repository upon acceptance (xxx).

#### 861 Author Contributions

862 T.A., S.T. and A.H designed the conceptual approach and carried out field work. S.T. and I.R.  
863 conducted laboratory work. S.T. and N.Z. performed bioinformatic analyses. S.T. and C.R.  
864 analysed the data. R.H. contributed with discussing the results in a broader ecological  
865 context. S.T. wrote the manuscript with major contributions from C.R. All authors read,  
866 commented and approved the final version of the manuscript.

#### 867 Competing interests

868 The authors declare no competing interests.

869 Supplemental Information

870 Supplemental Methods

871 Figure S 1 Environmental variables and their response to habitat type (open – overgrown).

872 Figure S 2 Venn diagram of shared putatively adaptive loci by different methods.

873 Figure S 3 SNP allele frequencies and their behaviour in open and overgrown habitats.

874 Figure S 4 Residual standard error results for IBD analyses, measured using the overall  
875 (3,084 loci) and neutral (2,619 loci) SNP sets.

876 Figure S 5 Genetic structure of *Primula veris* populations in the study area measured using  
877 the overall set of loci (3,084 loci).

878 Figure S 6 Isolation by distance pattern measured at the overall (3,084 SNPs) set of loci for  
879 *Primula veris* populations.

880 Figure S 7 Genetic and nucleotide diversity ( $H_o$  and  $\pi$ ) at the overall set of SNPs (3,084 loci).

881 Table S 1 Number of associations between SNPs and environmental variables.

882 Table S 2 Results of generalized mixed effect models for the effect of geographic distance  
883 and habitat type distance on pairwise genetic differentiation ( $F_{ST}$ ) for the neutral (2,619 loci)  
884 and overall (3,084 loci) SNP sets.

885 Table S 3 Genetic diversity measures using the overall set of SNPs (3,084 loci) for the studied  
886 populations of *Primula veris*.

887 Table S 4 Results of linear mixed effect models for  $H_o$ ,  $\pi$  for the overall SNP set (3,084 loci) of  
888 the studied *Primula veris* populations.

## 889 Tables

890 Table 1 Location information and genetic diversity measurements for the studied populations of *Primula veris* in Muhu and Saaremaa, Estonia.  
 891 Habitat – affiliation to open or overgrown grassland; pair – affiliation to a pair of closely situated populations (0 indicates affiliation to no pair);  
 892 N – sample size after SNP filtering; population size – estimated number of individuals per population;  $H_o$  – observed heterozygosity;  $\pi$  –  
 893 nucleotide diversity.

| Pop ID | Region   | Site     | Habitat   | Pair | Latitude<br>[°N] | Longitude<br>[°E] | N  | Population<br>size | Neutral SNP set |        | Adaptive SNP<br>set |        |
|--------|----------|----------|-----------|------|------------------|-------------------|----|--------------------|-----------------|--------|---------------------|--------|
|        |          |          |           |      |                  |                   |    |                    | $H_o$           | $\pi$  | $H_o$               | $\pi$  |
| 1      | Saaremaa | Asva1    | open      | 1    | 58.445           | 23.061            | 6  | 100                | 0.22            | 0.0033 | 0.23                | 0.0032 |
| 2      | Saaremaa | Asva2    | overgrown | 1    | 58.419           | 23.064            | 20 | 200                | 0.23            | 0.0027 | 0.25                | 0.0026 |
| 3      | Saaremaa | Atla     | overgrown | 0    | 58.302           | 21.936            | 10 | 100                | 0.30            | 0.0031 | 0.30                | 0.0026 |
| 4      | Saaremaa | Kahtla1  | open      | 0    | 58.466           | 23.240            | 20 | 200                | 0.25            | 0.0028 | 0.23                | 0.0023 |
| 5      | Muhu     | Koguva   | overgrown | 2    | 58.611           | 23.091            | 20 | 2000               | 0.26            | 0.0027 | 0.27                | 0.0024 |
| 6      | Muhu     | Koguva   | open      | 2    | 58.611           | 23.091            | 19 | 500                | 0.27            | 0.0028 | 0.26                | 0.0024 |
| 7      | Saaremaa | Kõruse   | overgrown | 3    | 58.447           | 21.939            | 20 | 1000               | 0.27            | 0.0029 | 0.25                | 0.0025 |
| 8      | Saaremaa | Kõruse   | open      | 3    | 58.447           | 21.939            | 19 | 1000               | 0.26            | 0.0028 | 0.23                | 0.0023 |
| 9      | Muhu     | Lõetsa1  | overgrown | 4    | 58.650           | 23.313            | 20 | 1000               | 0.28            | 0.0029 | 0.31                | 0.0027 |
| 10     | Muhu     | Lõetsa1  | open      | 4    | 58.650           | 23.314            | 19 | 1000               | 0.27            | 0.0029 | 0.25                | 0.0025 |
| 11     | Muhu     | Lõetsa2  | overgrown | 0    | 58.644           | 23.345            | 20 | 100                | 0.28            | 0.0029 | 0.31                | 0.0027 |
| 12     | Saaremaa | Lõu      | open      | 0    | 58.122           | 22.201            | 20 | 5000               | 0.26            | 0.0031 | 0.22                | 0.0026 |
| 13     | Muhu     | Mäla     | overgrown | 5    | 58.579           | 23.270            | 20 | 800                | 0.24            | 0.0029 | 0.27                | 0.0028 |
| 14     | Muhu     | Mäla     | open      | 5    | 58.579           | 23.271            | 15 | 500                | 0.26            | 0.0030 | 0.24                | 0.0026 |
| 15     | Saaremaa | Neeme    | open      | 0    | 58.484           | 21.947            | 20 | 1500               | 0.27            | 0.0029 | 0.22                | 0.0024 |
| 16     | Saaremaa | Neeme    | open      | 0    | 58.499           | 21.927            | 18 | 3000               | 0.28            | 0.0029 | 0.28                | 0.0028 |
| 17     | Muhu     | Nõmmküla | open      | 0    | 58.669           | 23.209            | 19 | 1000               | 0.27            | 0.0029 | 0.30                | 0.0026 |
| 18     | Muhu     | Nõmmküla | open      | 0    | 58.667           | 23.204            | 20 | 500                | 0.26            | 0.0028 | 0.28                | 0.0025 |
| 19     | Saaremaa | Orinõmme | open      | 6    | 58.585           | 23.024            | 20 | 3500               | 0.27            | 0.0028 | 0.26                | 0.0024 |
| 20     | Saaremaa | Orinõmme | overgrown | 6    | 58.584           | 23.024            | 20 | 5000               | 0.26            | 0.0028 | 0.27                | 0.0024 |
| 21     | Muhu     | Paenase  | overgrown | 7    | 58.641           | 23.159            | 20 | 1000               | 0.29            | 0.0029 | 0.30                | 0.0025 |

|                       |          |           |           |    |        |        |    |       |      |        |      |        |
|-----------------------|----------|-----------|-----------|----|--------|--------|----|-------|------|--------|------|--------|
| 22                    | Muhu     | Paenase   | open      | 7  | 58.641 | 23.154 | 19 | 1000  | 0.28 | 0.0028 | 0.30 | 0.0024 |
| 23                    | Saaremaa | Türju     | overgrown | 0  | 57.980 | 21.993 | 17 | 100   | 0.26 | 0.0028 | 0.25 | 0.0025 |
| 24                    | Saaremaa | Vanamõisa | open      | 0  | 58.243 | 22.674 | 19 | 1000  | 0.21 | 0.0024 | 0.20 | 0.0023 |
| 25                    | Saaremaa | Vanamõisa | open      | 8  | 58.225 | 22.685 | 15 | 500   | 0.21 | 0.0025 | 0.18 | 0.0022 |
| 26                    | Saaremaa | Vanamõisa | overgrown | 8  | 58.222 | 22.697 | 7  | 100   | 0.22 | 0.0031 | 0.25 | 0.0032 |
| 27                    | Muhu     | Võiküla1  | open      | 0  | 58.545 | 23.385 | 20 | 500   | 0.28 | 0.0028 | 0.28 | 0.0024 |
| 28                    | Muhu     | Võiküla2  | overgrown | 9  | 58.551 | 23.309 | 20 | 10000 | 0.27 | 0.0030 | 0.29 | 0.0027 |
| 29                    | Muhu     | Võiküla2  | open      | 9  | 58.551 | 23.309 | 19 | 10000 | 0.27 | 0.0029 | 0.27 | 0.0026 |
| 30                    | Saaremaa | Võrsna    | open      | 0  | 58.389 | 22.747 | 11 | 100   | 0.22 | 0.0027 | 0.23 | 0.0027 |
| 31                    | Muhu     | Üügu      | overgrown | 10 | 58.675 | 23.222 | 17 | 500   | 0.28 | 0.0029 | 0.29 | 0.0028 |
| 32                    | Muhu     | Üügu      | open      | 10 | 58.671 | 23.238 | 19 | 4000  | 0.27 | 0.0029 | 0.27 | 0.0025 |
| <b>Open mean</b>      |          |           |           |    |        |        |    | 1800  | 0.26 | 0.0029 | 0.25 | 0.0025 |
| <b>Overgrown mean</b> |          |           |           |    |        |        |    | 1700  | 0.27 | 0.0029 | 0.28 | 0.0027 |

894

895 Table 2 Results of linear mixed effect models for observed heterozygosity ( $H_o$ ), and  
 896 nucleotide diversity ( $\pi$ ) of *Primula veris* populations. Fitted parameters ( $\pm$  SE), t-values and  
 897 significance ( $p_{\text{Model}}$ ) is given for the full model of each genetic index,  $H_o$  and  $\pi$ . Factors:  
 898 habitat (H): open and overgrown; SNP\_set (S): SNP\_neutral and SNP\_adaptive.  $\text{RF}_{\text{region}}$  and  
 899  $\text{RF}_{\text{pop}}$  denote the use of region (Muhu and Saaremaa) and population (1–32) as random  
 900 factors (RF). The importance of the fixed factor interaction is given as  $\chi^2$  and  $p$ -values for  
 901 each genetic measurement. For  $H_o$  and  $\pi$ , the importance of the fixed factor interaction is  
 902 given for the comparison of the full model (with H \* S) with the next simplest model (H + S).

| Effect                                                                                  | Value               | SE                 | t      | $p_{\text{Model}}$ | $\chi^2$ | $p$   |
|-----------------------------------------------------------------------------------------|---------------------|--------------------|--------|--------------------|----------|-------|
| <b><math>H_o \sim H * S + \text{RF}_{\text{region}} + \text{RF}_{\text{pop}}</math></b> |                     |                    |        |                    |          |       |
| <b>Importance of H * S</b>                                                              |                     |                    |        |                    |          |       |
| Habitat                                                                                 | 0.027               | 0.008              | 3.304  | 0.002              |          |       |
| SNP_set                                                                                 | 0.008               | 0.005              | 1.793  | 0.083              |          |       |
| habitat:SNP_set                                                                         | -0.021              | 0.007              | -2.942 | 0.006              | 8.110    | 0.004 |
| <b><math>\pi \sim H * S + \text{RF}_{\text{region}} + \text{RF}_{\text{pop}}</math></b> |                     |                    |        |                    |          |       |
| <b>Importance of H * S</b>                                                              |                     |                    |        |                    |          |       |
| Habitat                                                                                 | 1.4e <sup>-4</sup>  | 7.0e <sup>-5</sup> | 2.009  | 0.051              |          |       |
| SNP_set                                                                                 | 3.4e <sup>-4</sup>  | 3.5e <sup>-5</sup> | 9.573  | <0.001             |          |       |
| habitat:SNP_set                                                                         | -1.1e <sup>-4</sup> | 5.6e <sup>-5</sup> | -1.985 | 0.056              | 3.949    | 0.047 |

903

904 Figures

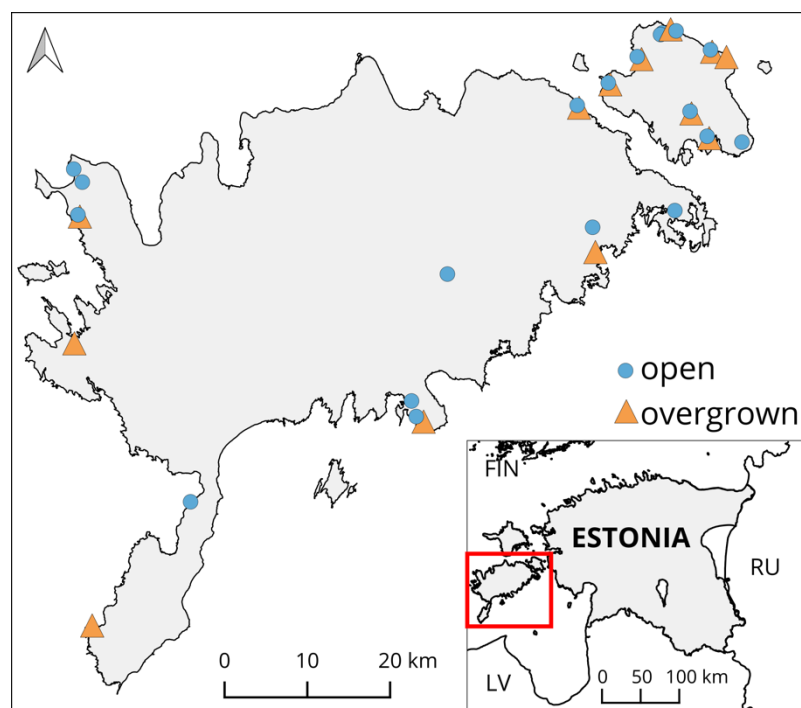

905

906 Figure 1 Map of the study area on Muhu and Saaremaa islands in Western Estonia. *Primula*  
907 *veris* populations are depicted with blue filled circles when occurring in open semi-natural  
908 grassland and with orange filled triangles when occurring in recently overgrown historical  
909 semi-natural grasslands.

910

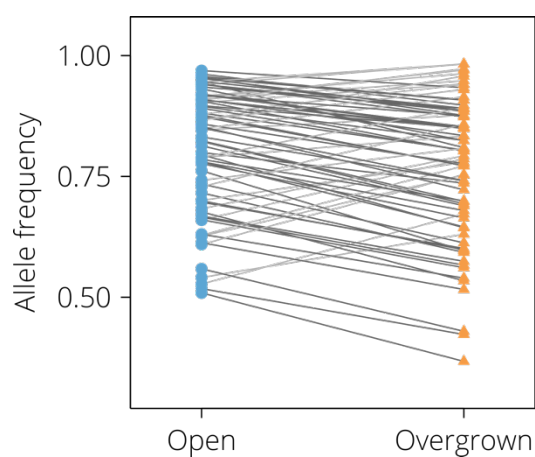

911

912 Figure 2 Patterns of allele frequency (AF) change of the 77 putatively adaptive SNPs  
913 (SNP\_adapt) averaged across pairs of populations for each SNP. For each SNP, the putatively  
914 beneficial allele frequency for the open habitat (AF > 0.5) is shown. SNPs were derived from  
915 linear and categorical environmental association analyses. SNPs with decreasing/increasing  
916 AF in overgrown habitats (orange triangles) compared to open habitats (blue circles) are  
917 indicated with dark grey/light grey lines, respectively. For detailed results, see Figure S 3.

918

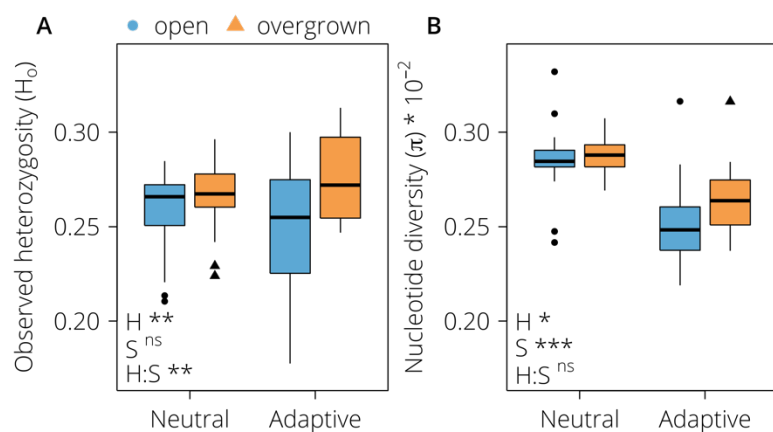

919

920 Figure 3 Boxplots of observed heterozygosity ( $H_0$ ; A) and nucleotide diversity ( $\pi$ ; B) at  
921 putatively neutral and adaptive loci in open (blue, circles) and overgrown (orange, triangles)  
922 grasslands. Factors: habitat (H): open and overgrown; SNP\_set (S): SNP\_neutral and  
923 SNP\_adaptive. Significance values: <sup>ns</sup>  $p > 0.05$ ; \*  $p \leq 0.05$ ; \*\*  $p < 0.01$ ; \*\*\*  $p < 0.001$ .



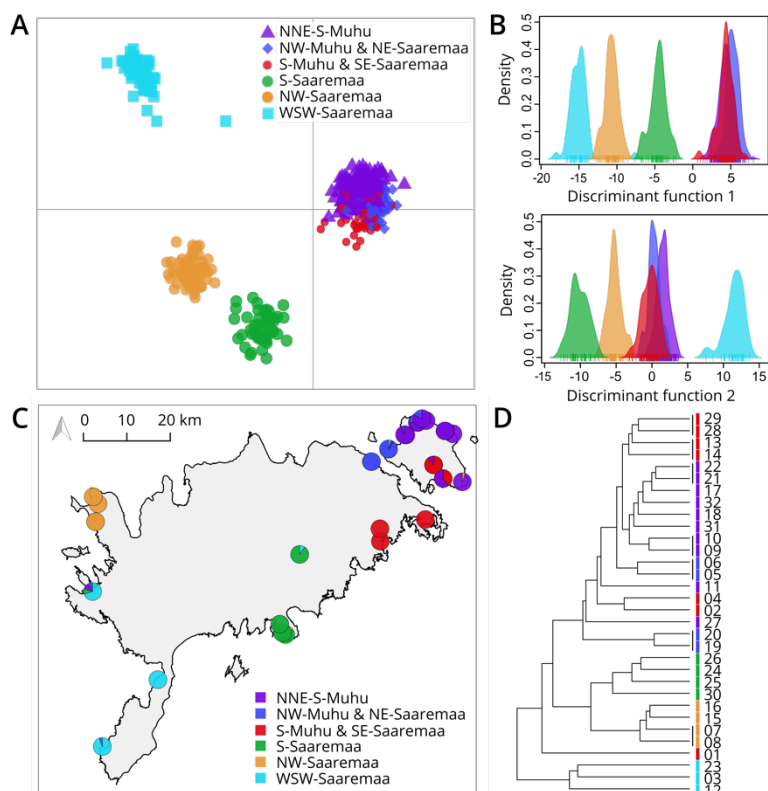

924

925 Figure 4 Genetic structure of *Primula veris* populations in the study region. (A) Result of the  
 926 discriminant analysis of principle components on the putatively neutral SNP set resulting in  
 927 six geographical clusters (C; named by cardinal directions). The distribution of the six  
 928 clusters per discriminant function is shown in panel B. (D) Result of the hierarchical  
 929 clustering tree analysis with population codes (see Table 1) and colour coding by cluster.

930

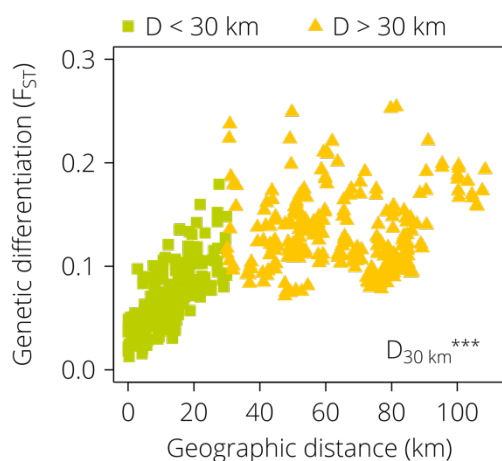

931

932 Figure 5 Relationship between genetic differentiation ( $F_{ST}$ ) and geographic distance for all  
933 possible pairs of 32 *Primula veris* populations, measured at putatively neutral loci.  
934 Population pairs with a geographic distance ( $D$ ) less or equal to 30 km are visualized as  
935 green squares. Population pairs with a geographic distance greater than 30 km are given as  
936 yellow triangles. The effect of geographic distance on  $F_{ST}$  is highly significant ( $p < 0.001$ ) up  
937 to a threshold of 30 km.
